# Supplementary material for: Degradation of methyl salicylate through Cl initiated atmospheric oxidation – a theoretical study
Source: Royal Society of Chemistry journal article supplement (doi:10.1039/c4ra02398f), 2014-01-01
Supplement: c4ra02398f1.pdf [file c4ra02398f1.pdf]

## Supplementary Information

### Degradation of methyl salicylate through Cl initiated atmospheric oxidation - A theoretical study

A. Mano Priya and L. Senthilkumar\*

Department of Physics, Maruthamalai Road, Bharathiar University, Coimbatore-641046,  
Tamil Nadu, INDIA

\*Corresponding Author Email: [lsenthilkumar@buc.edu.in](mailto:lsenthilkumar@buc.edu.in)

**Table S1** The selected geometrical parameters (bond length R, in Å, bond angle,  $\theta$  and dihedral angle,  $\phi$  in degrees) on the potential energy surface of the favourable reaction path calculated at M06-2X/6-311++G(d,p) level of theory.

| Geometrical parameters        | M06-2X/6-311++G(d,p) |             |        |
|-------------------------------|----------------------|-------------|--------|
|                               | MeSA+Cl              | TS1         | I1     |
| R(C3-H16)                     | 1.082                | 1.083       | 6.640  |
| R(H16-C120)                   | 3.775                | 3.772       | 1.296  |
| $\theta$ (C3-H16-Cl20)        | 85.3                 | 70.7        | 167.8  |
|                               | I1+O <sub>2</sub>    | -           | I2     |
| R(C3-O16)                     | 5.288                | Barrierless | 1.399  |
| R(O16-O20)                    | 1.188                |             | 1.309  |
| $\theta$ (C3-O16-O20)         | 99.7                 |             | 112.3  |
|                               | I2+NO                | TS4         | I3     |
| R(N21-O22)                    | 1.156                | 1.164       | 1.192  |
| R(O20-N21)                    | 1.425                | 1.390       | 1.185  |
| $\theta$ (C3-O16-O20)         | 107.9                | 115.7       | 86.3   |
| $\phi$ ( C3-O16-<br>O20- N21) | -120.6               | -1.37       | -169.9 |

**Table S2 The global reactivity parameters, hardness ( $\eta$ ), softness  $1/\eta$ , electrophilicity index ( $\omega$ ), activation hardness ( $\Delta n^*$ ) in eV calculated at M06-2X/6-311++G(d,p) level of theory.**

| Stationary point   | $\eta$ | $1/\eta$ | $\omega$ | $\Delta n^*$ |
|--------------------|--------|----------|----------|--------------|
| MeSA+Cl            | 4.389  | 0.227    | 2.095    | 0.739        |
| TS1                | 3.650  | 0.273    | 2.637    |              |
| I1                 | 3.681  | 0.271    | 2.720    |              |
| I1+O <sub>2</sub>  | 4.279  | 0.233    | 2.340    |              |
| I2                 | 3.633  | 0.275    | 3.023    | barrierless  |
| I2+HO <sub>2</sub> | 4.848  | 0.206    | 2.265    |              |
| TS2                | 3.193  | 0.313    | 3.630    | 1.655        |
| P1                 | 3.615  | 0.276    | 2.850    |              |
| I2+NO <sub>2</sub> | 4.492  | 0.222    | 2.294    |              |
| TS3                | 3.405  | 0.293    | 3.655    | 1.087        |
| P2                 | 3.564  | 0.280    | 3.066    |              |
| I2+NO              | 3.452  | 0.289    | 3.166    |              |
| TS4                | 3.591  | 0.278    | 3.072    | -0.139       |
| I3                 | 3.176  | 0.314    | 2.824    |              |
| I3+O <sub>2</sub>  | 2.086  | 0.479    | 4.300    | *            |
| P3                 | 2.494  | 0.400    | 6.619    |              |

\*Indicates structure not converged

$\Delta n^*$  has been calculated for pre-reactive reactants

$\eta$  has been calculated by the equation (9) given in the text above

**Table S3** The global reactivity parameters, Homo, lumo, energy gap ( $\Delta E$ ) in eV calculated at M06-2X/6-311++G(d,p) level of theory.

| Reaction        | Homo    | Lumo   | $\Delta E$ |
|-----------------|---------|--------|------------|
| MeSA            | -7.916  | -0.661 | 7.254      |
| TS1             | -8.038  | -0.737 | 7.301      |
| I1              | -8.156  | -0.794 | 7.362      |
| O <sub>2</sub>  | -9.353  | -3.239 | 6.114      |
| I2              | -8.320  | -1.053 | 7.267      |
| HO <sub>2</sub> | -10.750 | -0.293 | 10.457     |
| TS2             | -8.008  | -1.622 | 6.386      |
| P1              | -8.156  | -0.924 | 7.231      |
| NO <sub>2</sub> | -10.038 | -1.156 | 8.882      |
| TS3             | -8.402  | -1.592 | 6.810      |
| P2              | -8.240  | -1.111 | 7.129      |
| NO              | -7.943  | -1.416 | 6.527      |
| TS4             | -8.289  | -1.106 | 7.182      |
| I3              | -7.411  | -1.059 | 6.352      |
| P3              | -8.242  | -3.252 | 4.989      |

**Table S4** NOFFs (unit in electrons) of methyl salicylate with Cl radical of initial reaction and peroxy radical with their reactivities calculated at M06-2X/6-311++G(d,p) level of theory.

| Stationary point | Bond parameter | Bonding orbital BD |                 | Anti-bonding orbital BD* |             | Reactivity           |
|------------------|----------------|--------------------|-----------------|--------------------------|-------------|----------------------|
|                  |                | $f_{nbo}^+$        | $f_{nbo}^-$     | $f_{nbo}^+$              | $f_{nbo}^-$ |                      |
| MeSA             | C3-H16         | -0.988             | 0.988           | -0.005                   | 0.006       | <b>Electrophilic</b> |
|                  | C3-C2          | -0.988             | 0.985           | -0.011                   | 0.012       | <b>Electrophilic</b> |
|                  | C3-C4          | -0.989             | 0.987           | -0.006                   | 0.007       | <b>Electrophilic</b> |
| TS1              | C3-H16         | 0.988              | -0.987          | 0.006                    | -0.004      | <b>Nucleophilic</b>  |
|                  | C3-C2          | 0.987              | -0.991          | 0.011                    | -0.011      | <b>Nucleophilic</b>  |
|                  | C3-C4          | 0.988              | -0.991          | 0.007                    | -0.005      | <b>Nucleophilic</b>  |
| I1               | C3-C2          | 0.979              | -0.995          | 0.010                    | -0.021      | <b>Nucleophilic</b>  |
|                  | C3-C4          | 0.983              | -0.996          | 0.006                    | -0.010      | <b>Nucleophilic</b>  |
| O <sub>2</sub>   | O16-O20        | -1.000             | 1.000           | 0                        | 0           | <b>Inactive</b>      |
| I2               |                |                    | (electrophilic) |                          |             |                      |
|                  | C3-C2          | 0.988              | -0.988          | 0.023                    | -0.019      | <b>Nucleophilic</b>  |
|                  | C3-C4          | 0.990              | -0.986          | 0.012                    | -0.008      | <b>Nucleophilic</b>  |
|                  | C3-O16         | 0.992              | -0.997          | 0.022                    | -0.022      | <b>Nucleophilic</b>  |
|                  | O16-O20        | 0.989              | -0.997          | 0.000                    | -0.018      | <b>Nucleophilic</b>  |

**Electrophilic-** This captures the ability of the NBO to donate electrons

**Nucleophilic-** This captures the ability of the NBO to accept electrons

**Inactive-** It means that orbital prefers to neither accept nor donate electrons

**Table S5 NOFFs (unit in electrons) of peroxy radical with HO<sub>2</sub>, NO<sub>2</sub>, NO radical and their corresponding intermediates, transition state and products with their reactivities calculated at M06-2X/6-311++G(d,p) level of theory.**

| Reaction        | Bond parameter | Bonding orbital BD |             | Anti-bonding orbital BD* |             | Reactivity    |
|-----------------|----------------|--------------------|-------------|--------------------------|-------------|---------------|
|                 |                | $f_{nbo}^+$        | $f_{nbo}^-$ | $f_{nbo}^+$              | $f_{nbo}^-$ |               |
| HO <sub>2</sub> | H21-O22        | 0.996              | -0.998      | 0.024                    | -0.000      | Nucleophilic  |
|                 | O22-O23        | 0.998              | -0.999      | 0.000                    | -0.001      | Nucleophilic  |
| TS2             | C3-C2          | -0.983             | 0.982       | -0.015                   | 0.015       | Electrophilic |
|                 | C3-C4          | -0.989             | 0.987       | -0.010                   | 0.011       | Electrophilic |
|                 | C3-O16         | -0.997             | 0.996       | -0.017                   | 0.018       | Electrophilic |
|                 | O16-O20        | -0.994             | 0.995       | -0.010                   | 0.008       | Electrophilic |
|                 | O22-O23        | -0.979             | 0.975       | -0.008                   | 0.008       | Electrophilic |
| P1              | C3-C2          | -0.988             | 0.985       | -0.020                   | 0.019       | Electrophilic |
|                 | C3-C4          | -0.989             | 0.987       | -0.011                   | 0.012       | Electrophilic |
|                 | C3-O16         | -0.995             | 0.996       | -0.012                   | 0.012       | Electrophilic |
|                 | O16-O20        | -0.990             | 1.004       | -0.008                   | 0.021       | Electrophilic |
|                 | O20-H21        | -1.000             | 1.001       | -0.003                   | 0.004       | Electrophilic |
| NO <sub>2</sub> | O22-N21        | 0.999              | -0.992      | 0.023                    | -0.027      | Nucleophilic  |
|                 | N21-O23        | 0.999              | -0.981      | 0.023                    | -0.006      | Nucleophilic  |
| TS3             | C3-C2          | -0.986             | 0.984       | -0.395                   | 0.395       | Electrophilic |
|                 | C3-C4          | -0.990             | 0.988       | -0.011                   | 0.012       | Electrophilic |
|                 | C3-O16         | -0.996             | 0.996       | -0.015                   | 0.014       | Electrophilic |
|                 | O16-O20        | -0.985             | 0.991       | -0.031                   | 0.037       | Electrophilic |
|                 | O22-N21        | -0.996             | 0.996       | -0.032                   | 0.026       | Electrophilic |
|                 | N21-O23        | -0.998             | 1.000       | -0.035                   | 0.025       | Electrophilic |
|                 | O22-O23        | -0.993             | 0.995       | -0.123                   | 0.114       | Electrophilic |
| P2              | C3-C2          | -0.986             | 0.982       | -0.017                   | 0.017       | Electrophilic |
|                 | C3-C4          | -0.990             | 0.987       | -0.011                   | 0.012       | Electrophilic |
|                 | C3-O16         | -0.995             | 0.995       | -0.016                   | 0.015       | Electrophilic |
|                 | O16-O20        | -0.992             | 0.994       | -0.017                   | 0.021       | Electrophilic |
|                 | O22-N21        | -0.993             | 0.995       | -0.147                   | 0.134       | Electrophilic |
|                 | N21-O23        | -0.998             | 0.997       | -0.517                   | 0.513       | Electrophilic |
| NO              | N21-O22        | 0                  | -1          | 0                        | 0           | Inactive      |
| TS4             | C3-C2          | -0.987             | 0.985       | -0.021                   | 0.020       | Electrophilic |
|                 | C3-C4          | -0.990             | 0.987       | -0.012                   | 0.012       | Electrophilic |
|                 | C3-O16         | -0.995             | 0.996       | -0.016                   | 0.015       | Electrophilic |
|                 | O16-O20        | -0.988             | 0.999       | -0.029                   | 0.044       | Electrophilic |
|                 | N21-O22        | -0.999             | 1.000       | -0.078                   | 0.100       | Electrophilic |
|                 | O20-N21        | -0.994             | 0.999       | -0.070                   | 0.061       | Electrophilic |
| I3              | C3-C2          | 0.982              | -0.991      | 0.037                    | -0.035      | Nucleophilic  |
|                 | C3-C4          | 0.987              | -0.993      | 0.024                    | -0.021      | Nucleophilic  |
|                 | C3-O16         | 0.996              | -0.997      | 0.004                    | -0.005      | Nucleophilic  |
| P3              | C3-C2          | 0.979              | -0.995      | 0.010                    | -0.021      | Nucleophilic  |
|                 | C3-C4          | 0.983              | -0.996      | 0.006                    | -0.010      | Nucleophilic  |

**Electrophilic-** This captures the ability of the NBO to donate electrons

**Nucleophilic-** This captures the ability of the NBO to accept electrons

**Inactive-** It means that orbital prefers to neither accept nor donate electrons

**Table S6 Topological analysis of reactants, transition states, intermediates and products of methyl salicylate with Cl radical calculated at M06-2X/6-311++G(d,p) level of theory (values are in atomic units).**

| Reaction              | Bond parameter | $\rho(r)$ | $\nabla^2\rho(r)$ | $\varepsilon$ | V(r)    | G(r)    | H(r)    |
|-----------------------|----------------|-----------|-------------------|---------------|---------|---------|---------|
| <b>MeSA</b>           | C3-H16         | 0.2802    | -0.9620           | 0.0205        | -0.3160 | 0.0377  | -0.2782 |
|                       | C3-C2          | 0.3096    | -0.8778           | 0.2156        | -0.4202 | 0.1003  | -0.3198 |
|                       | C3-C4          | 0.3116    | -0.8724           | 0.2094        | -0.4291 | 0.1055  | -0.3236 |
| <b>TS1</b>            | C3-H16         | 0.2806    | -0.9655           | 0.0187        | -0.3155 | 0.0370  | -0.2784 |
|                       | C3-C2          | 0.3085    | -0.8743           | 0.2046        | -0.4153 | 0.0984  | -0.3169 |
|                       | C3-C4          | 0.3121    | -0.8753           | 0.2083        | -0.4303 | 0.1057  | -0.3245 |
| <b>I1</b>             | C3-C2          | 0.3127    | -0.8849           | 0.2026        | -0.4304 | 0.1046  | -0.3258 |
|                       | C3-C4          | 0.3211    | -0.9185           | 0.1964        | -0.4679 | 0.1191  | -0.3488 |
| <b>O<sub>2</sub></b>  | O16-O20        | 0.5614    | -0.8980           | 0.0378        | -1.2198 | 0.4976  | -0.7221 |
| <b>I2</b>             | C3-C2          | 0.3082    | -0.8657           | 0.2698        | -0.4048 | 0.0941  | -0.3106 |
|                       | C3-C4          | 0.3179    | -0.9097           | 0.2531        | -0.4492 | 0.1109  | -0.3383 |
|                       | C3-O16         | 0.2656    | -0.3308           | 0.0474        | -0.6541 | 0.2857  | -0.3684 |
| <b>HO<sub>2</sub></b> | O16-O20        | 0.4045    | -0.2978           | 0.0219        | -0.7110 | 0.3183  | -0.3927 |
|                       | O22-O23        | 0.4206    | -0.3851           | 0.0198        | -0.7505 | 0.3271  | -0.4234 |
|                       | H21-O22        | 0.3618    | -2.5691           | 0.0277        | -0.7659 | 0.0618  | -0.7040 |
| <b>TS2</b>            | C3-C2          | 0.3086    | -0.8714           | 0.2688        | -0.4045 | 0.0933  | -0.3111 |
|                       | C3-C4          | 0.3156    | -0.8943           | 0.2388        | -0.4513 | 0.1138  | -0.3374 |
|                       | C3-O16         | 0.2613    | -0.2331           | 0.0196        | -0.6621 | 0.3019  | -0.3601 |
|                       | O16-O20        | 0.3931    | -0.2747           | 0.0208        | -0.6668 | 0.2991  | -0.3677 |
|                       | H21-O23        | 0.2504    | -1.3749           | 0.1213        | 0.0900  | -0.5238 | -0.4337 |
| <b>P1</b>             | O22-O23        | 0.2716    | 0.2449            | 0.1182        | 0.2466  | -0.4321 | -0.1854 |
|                       | C3-C2          | 0.3079    | -0.8673           | 0.2621        | -0.4039 | 0.0935  | -0.3104 |
|                       | C3-C4          | 0.3177    | -0.9094           | 0.2514        | -0.4441 | 0.1084  | -0.3357 |
|                       | C3-O16         | 0.2832    | -0.3532           | 0.0495        | -0.7198 | 0.3157  | 0.4040  |
|                       | O16-O20        | 0.2924    | -0.0187           | 0.0022        | -0.4116 | 0.2035  | -0.2081 |
| <b>NO<sub>2</sub></b> | N21-O22        | 0.5384    | -1.3663           | 0.0574        | -1.2335 | 0.4459  | -0.7875 |
|                       | N21-O23        | 0.5314    | -1.3096           | 0.0581        | -1.2018 | 0.4372  | -0.7646 |
| <b>TS3</b>            | C3-C2          | 0.3164    | -0.9036           | 0.2437        | -0.4394 | 0.1067  | -0.3326 |
|                       | C3-C4          | 0.3089    | -0.8695           | 0.2786        | -0.4060 | 0.0943  | -0.3117 |
|                       | C3-O16         | 0.2692    | -0.2254           | 0.0141        | -0.6961 | 0.3199  | -0.3762 |
|                       | O16-O20        | 0.2935    | 0.0260            | 0.0054        | -0.4249 | 0.2157  | -0.2092 |
|                       | N21-O20        | 0.2931    | -0.2292           | 0.0397        | -0.3999 | 0.1713  | -0.2286 |
|                       | N21-O22        | 0.5434    | -1.2831           | 0.1140        | -1.1996 | 0.4394  | -0.7602 |
|                       | N21-O23        | 0.5499    | -1.3262           | 0.1137        | -1.2275 | 0.4480  | -0.7795 |
| <b>P2</b>             | C3-C2          | 0.3081    | -0.8665           | 0.2743        | -0.4035 | 0.0934  | -0.3100 |
|                       | C3-C4          | 0.3153    | -0.8931           | 0.2440        | -0.4433 | 0.1100  | -0.3333 |
|                       | C3-O16         | 0.2650    | -0.2441           | 0.0239        | -0.6735 | 0.3062  | -0.3673 |
|                       | O16-O20        | 0.3298    | -0.0906           | 0.0230        | -0.5034 | 0.2403  | -0.2630 |
| <b>NO</b>             | N21-O22        | 0.5727    | -1.8902           | 0.1044        | -1.6401 | 0.5837  | -1.0563 |
| <b>TS4</b>            | C3-C2          | 0.3084    | -0.8702           | 0.2623        | -0.4030 | 0.0927  | -0.3103 |
|                       | C3-C4          | 0.3099    | -0.8766           | 0.2710        | -0.4349 | 0.1079  | -0.3270 |
|                       | C3-O16         | 0.2694    | -0.2016           | 0.0058        | -0.7020 | 0.3258  | -0.3762 |
|                       | O16-O20        | 0.2833    | 0.0429            | 0.0977        | -0.3964 | 0.2036  | -0.1928 |
|                       | O21-N21        | 0.3327    | -0.3838           | 0.0933        | -0.5419 | 0.2230  | -0.3189 |
|                       | N21-O22        | 0.5785    | -1.8406           | 0.0971        | -1.4197 | 0.4798  | -0.9399 |
| <b>I3</b>             | C3-C2          | 0.3125    | -0.9250           | 0.1962        | -0.4108 | 0.0898  | -0.3210 |
|                       | C3-C4          | 0.3222    | -0.9681           | 0.1822        | -0.4446 | 0.1013  | -0.3433 |
|                       | C3-O16         | 0.2864    | -0.6068           | 0.0467        | -0.635  | 0.2416  | -0.3933 |
| <b>P3</b>             | C3-C2          | 0.3139    | -0.8902           | 0.2046        | -0.4338 | 0.1056  | -0.3282 |
|                       | C3-C4          | 0.3206    | -0.9162           | 0.1940        | -0.4667 | 0.1188  | -0.3478 |

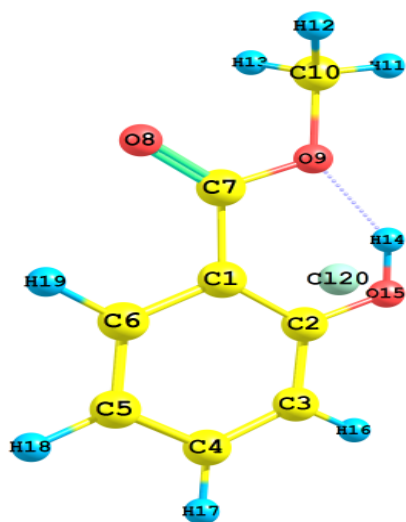

Reactant

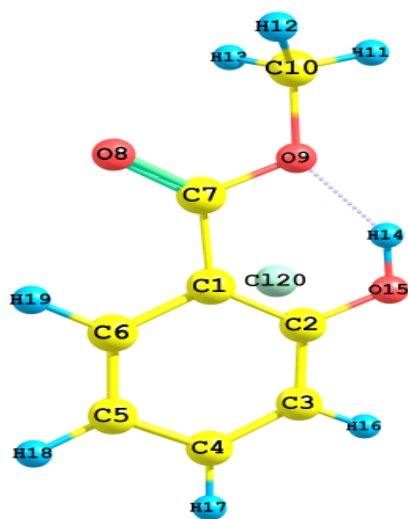

TS1

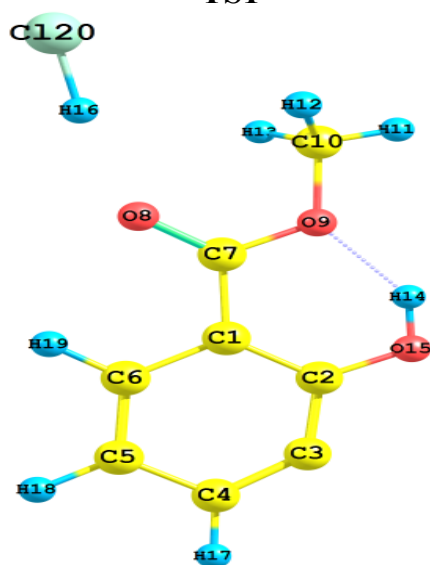

II

Fig.S1

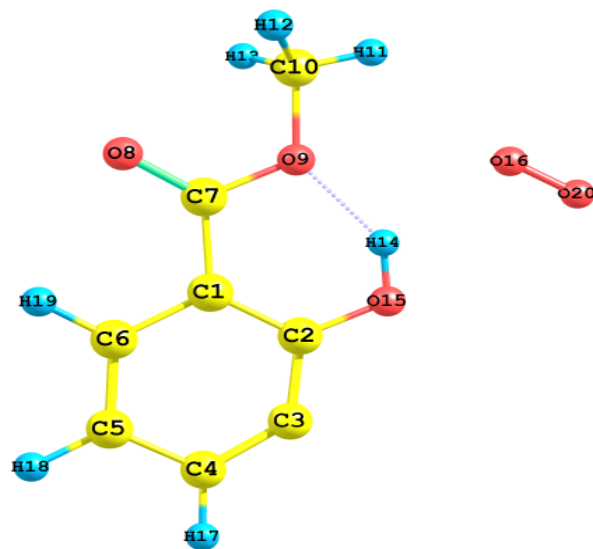

I1+O<sub>2</sub>

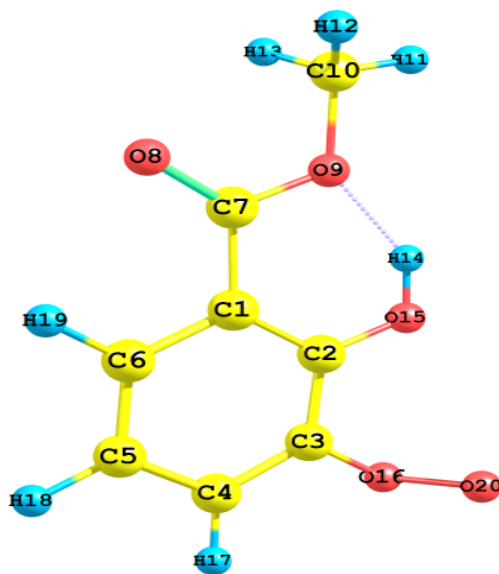

I2

Fig.S1 contd...



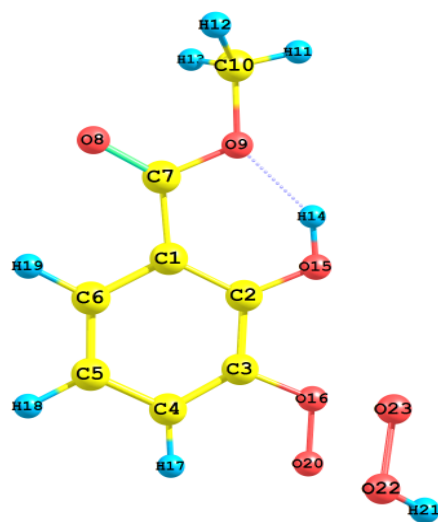

I2+HO<sub>2</sub>

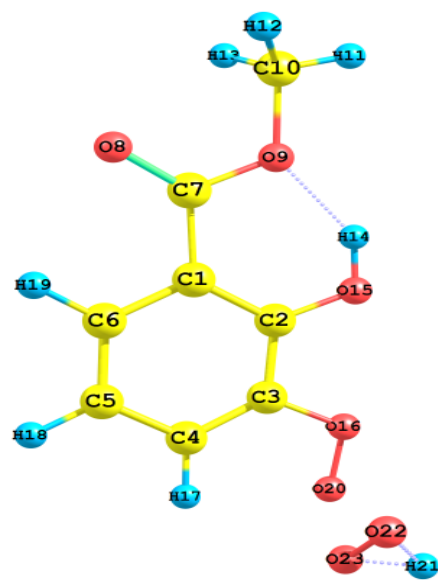

TS2

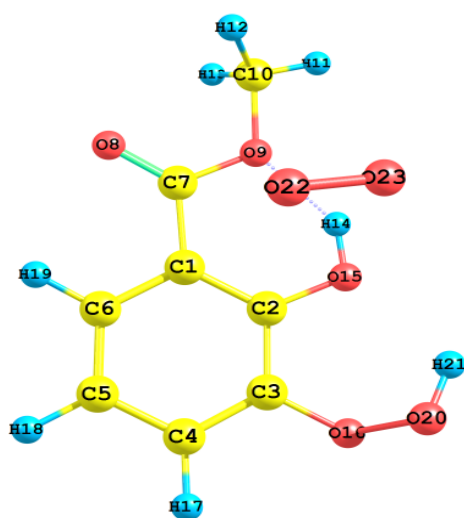

P1

Fig. S2

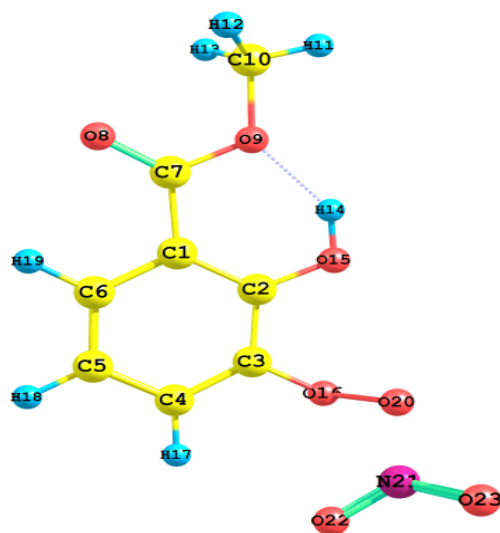

I2+NO<sub>2</sub>

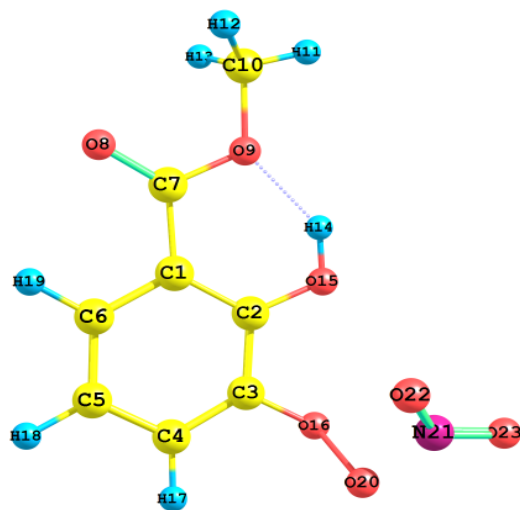

TS3

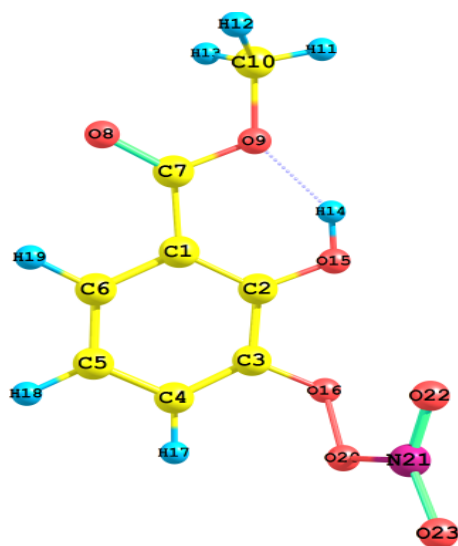

P2

Fig.S2 contd...

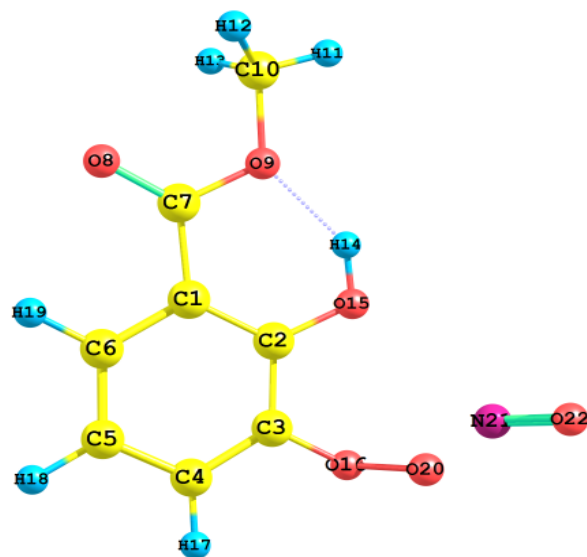

I2+NO

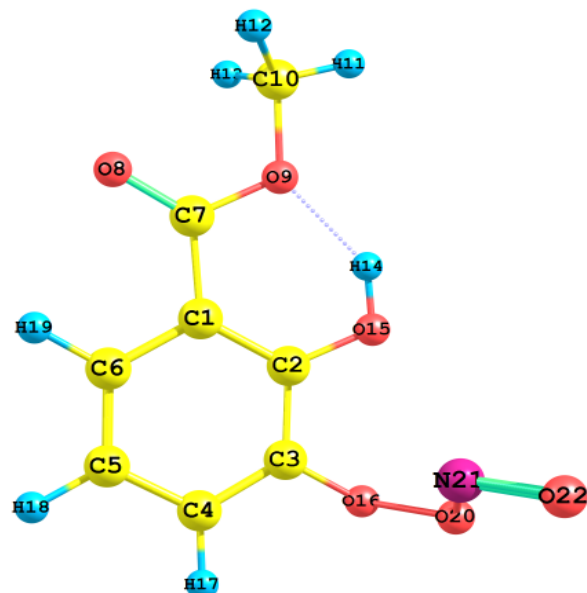

TS4

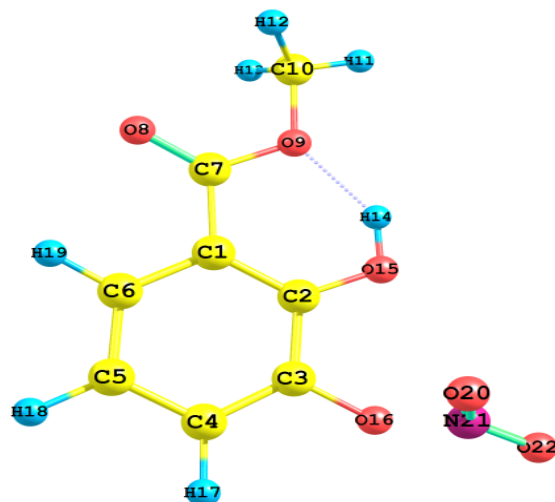

I3

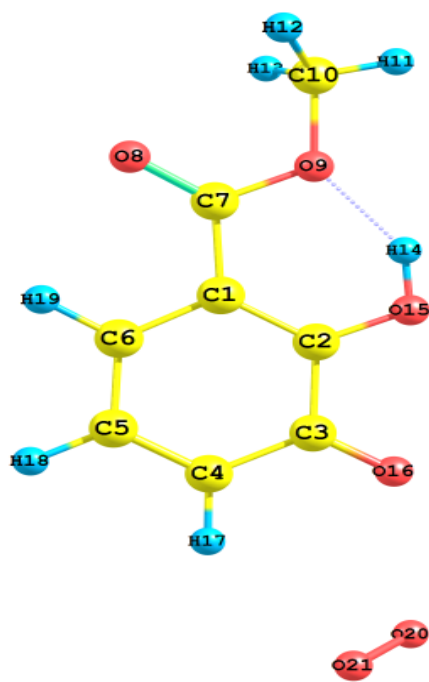

I3+O2

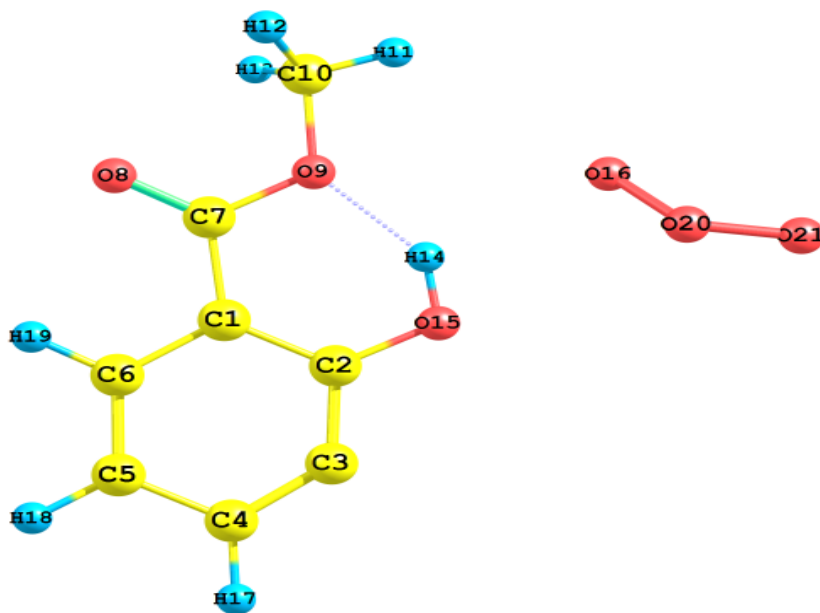

P3

Fig.S2 contd...

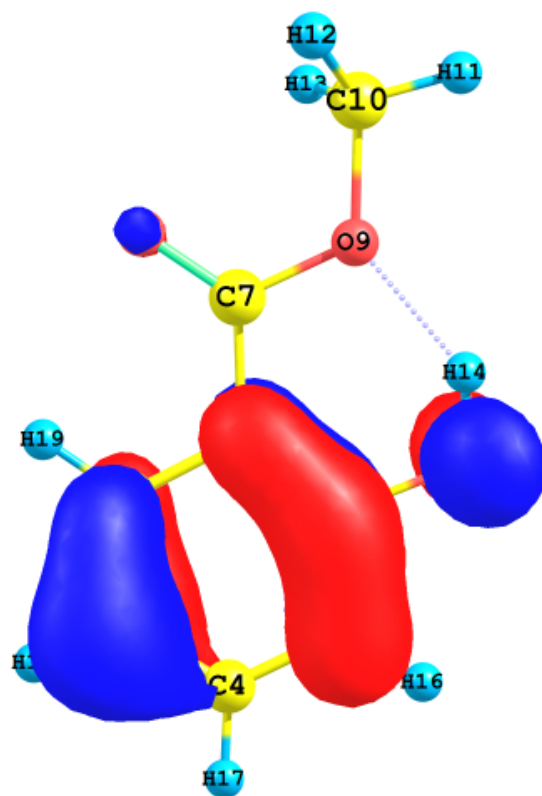

Reactant-HOMO

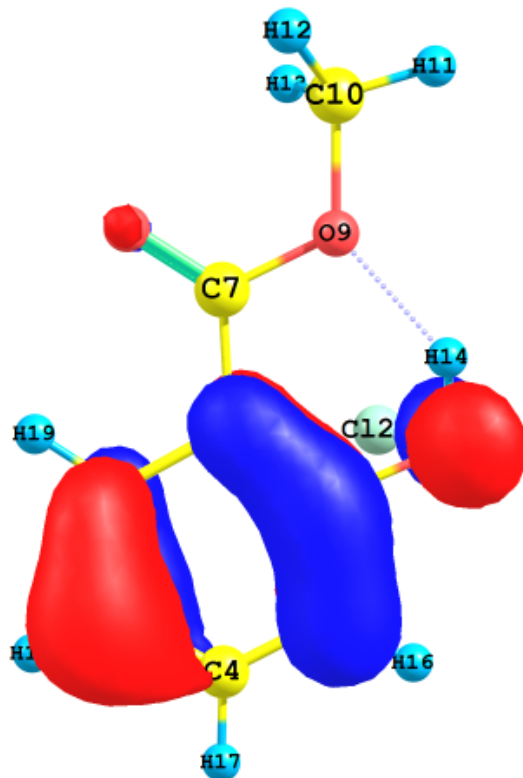

TS1-HOMO

Fig.S3

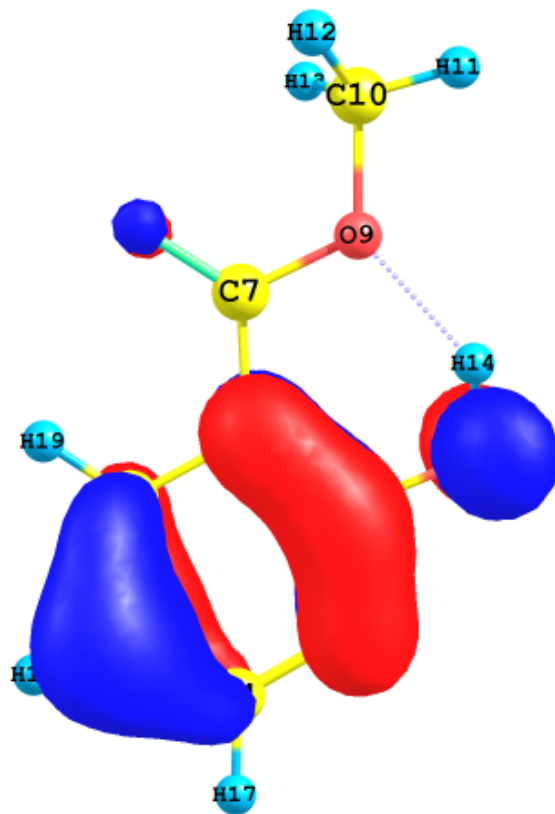

I1-HOMO

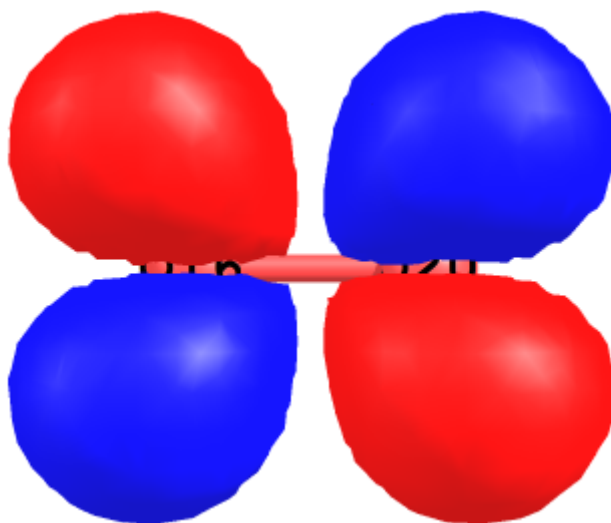

O<sub>2</sub>-HOMO

Fig.S3 contd...

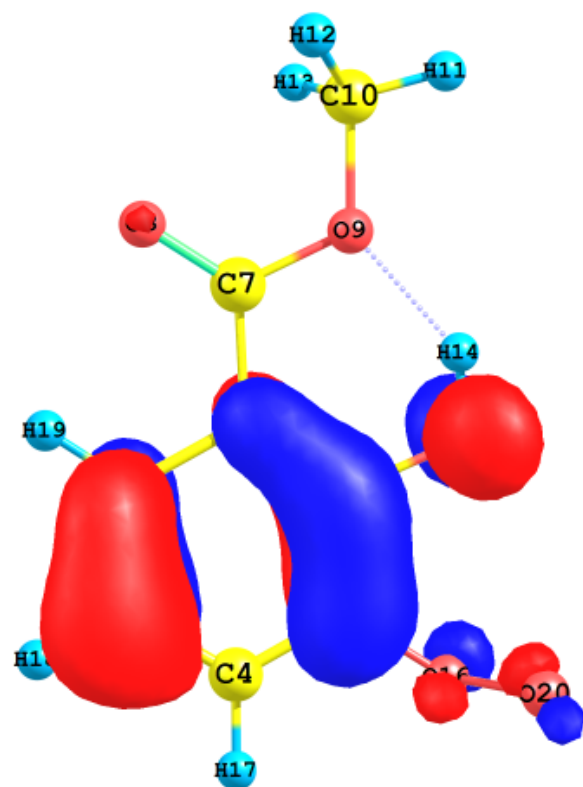

I2-HOMO

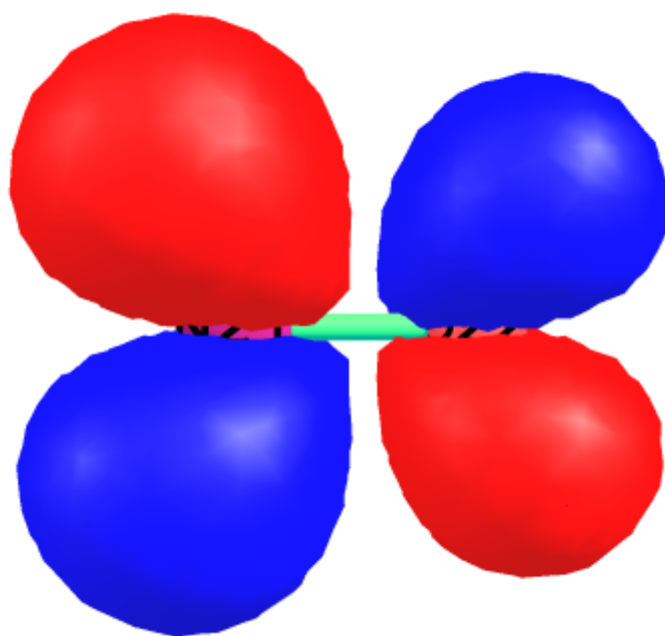

NO-HOMO

Fig.S3contd...

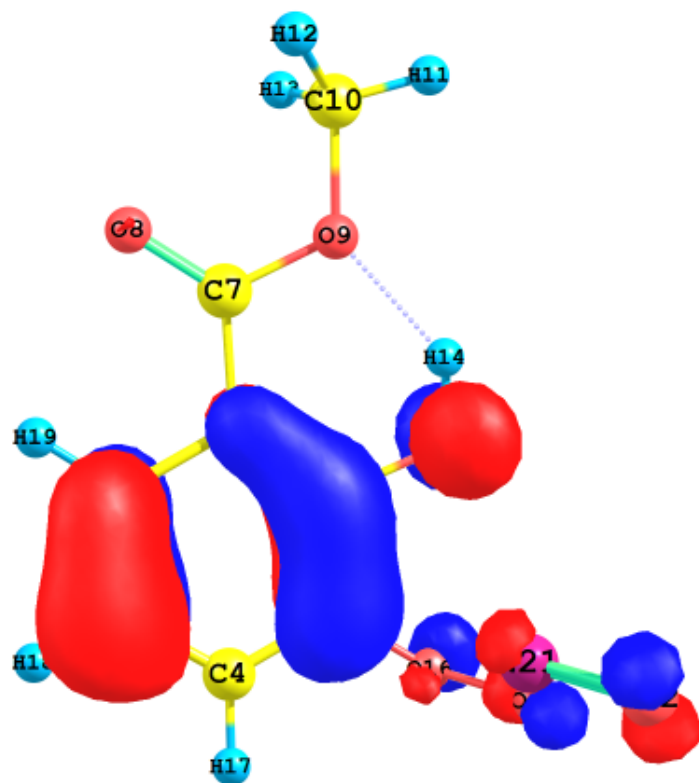

TS4-HOMO

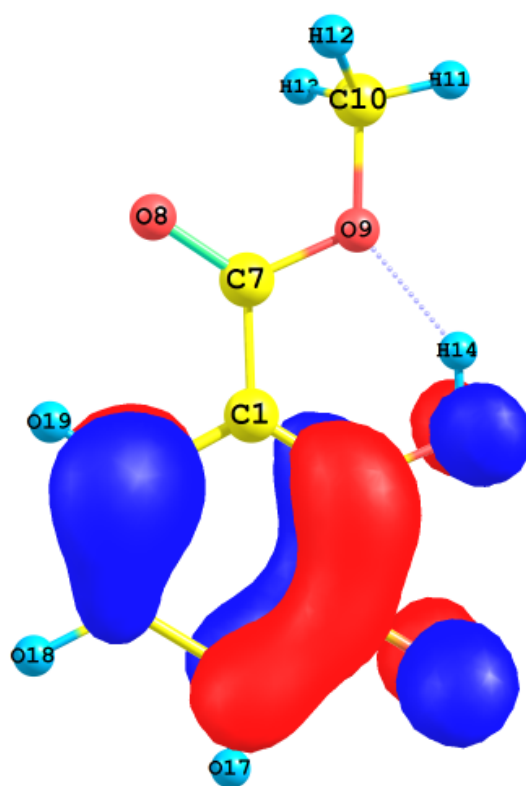

I3-HOMO

Fig.S3 contd...



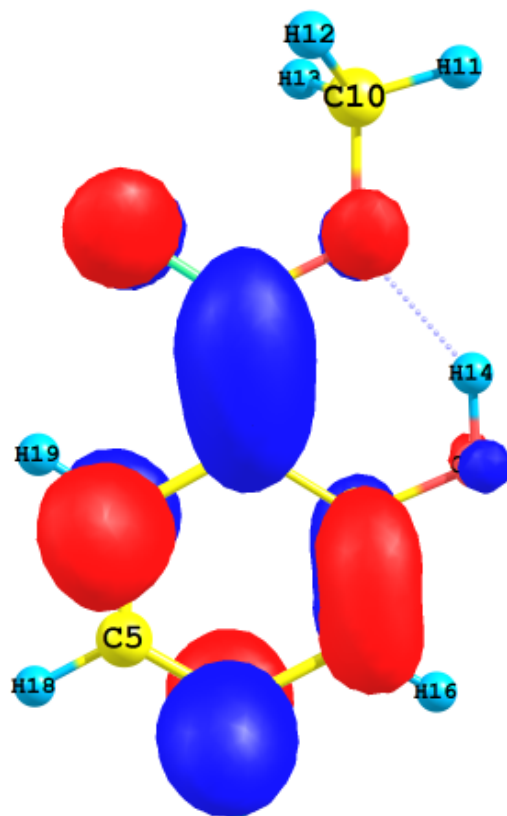

Reactant-LUMO

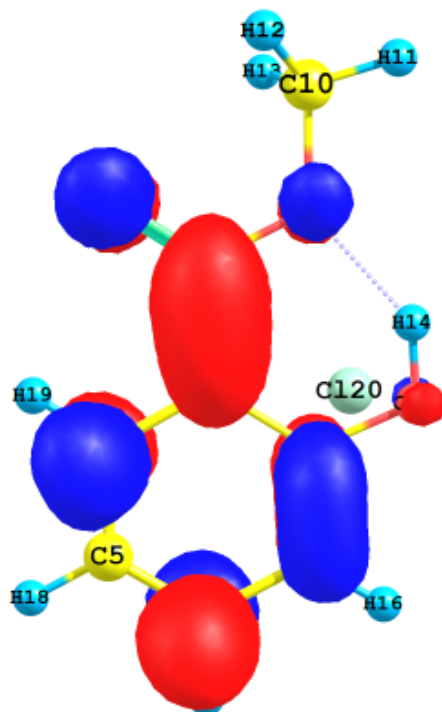

TS1-LUMO

Fig.S4

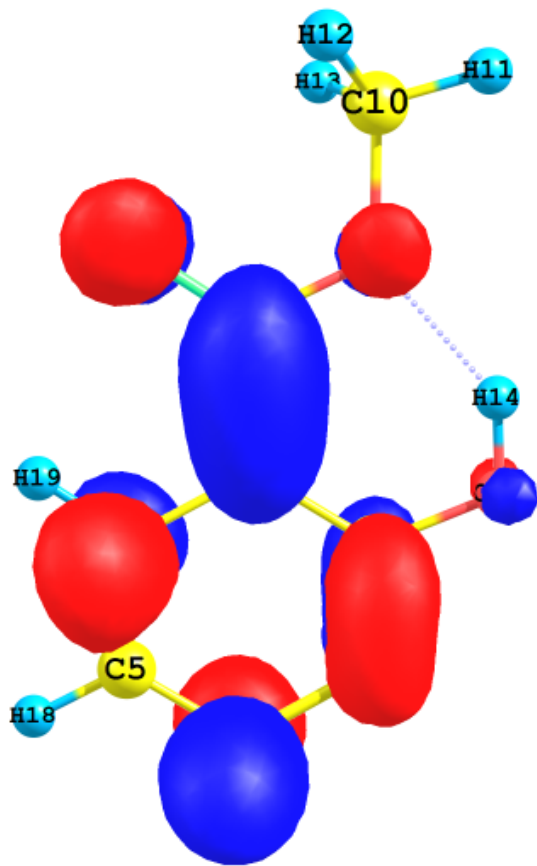

I1-LUMO

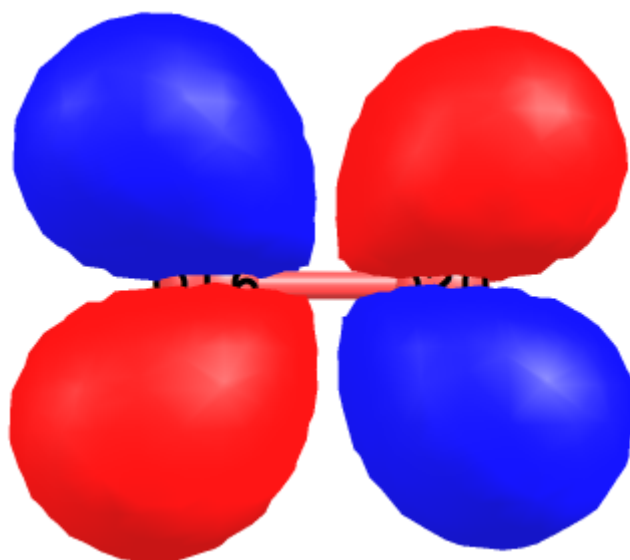

O<sub>2</sub>-LUMO

Fig.S4 contd...

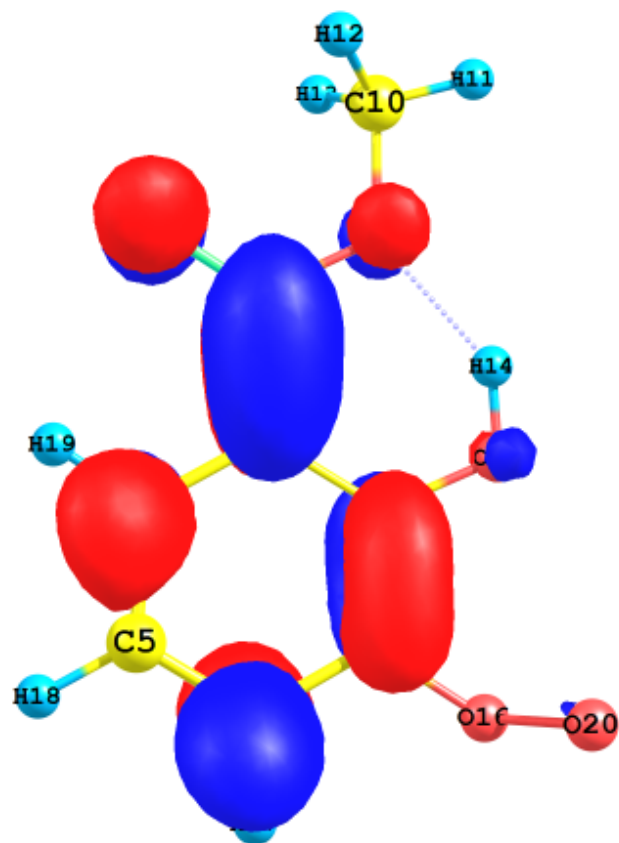

I2-LUMO

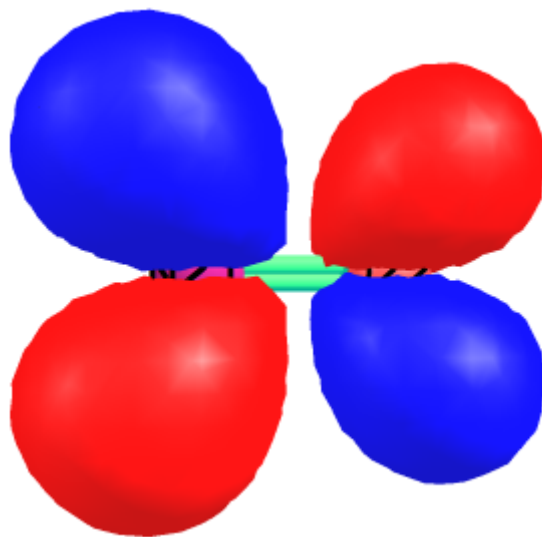

NO-LUMO

Fig.S4 contd...

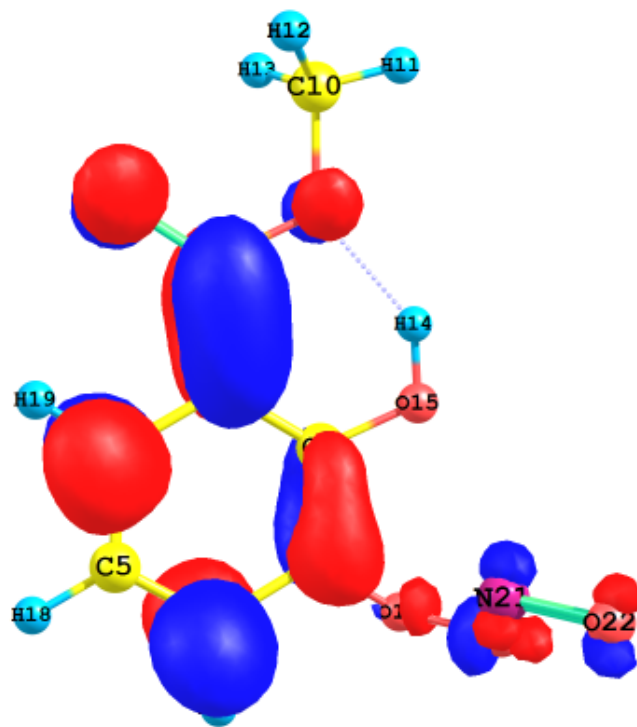

TS4-LUMO

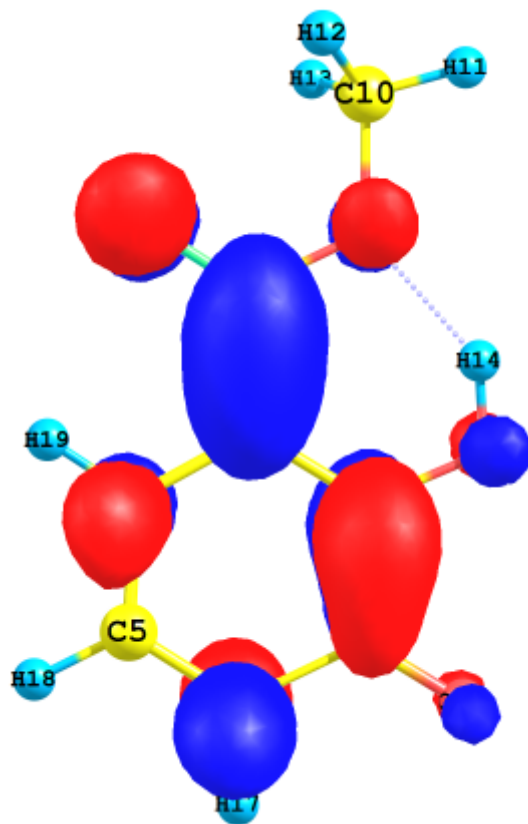

I3-LUMO

Fig.S4 contd...

## TABLE CAPTIONS

Table S1 The selected geometrical parameters (bond length  $R$ , in Å, bond angle,  $\theta$  and dihedral angle,  $\phi$  in degrees) on the potential energy surface of the favourable reaction path calculated at M06-2X/6-311++G(d,p) level of theory.

Table S2 The global reactivity parameters, hardness ( $\eta$ ), softness  $1/\eta$ , electrophilicity index ( $\omega$ ), activation hardness ( $\Delta n^*$ ) in eV calculated at M06-2X/6-311++G(d,p) level of theory.

Table S3 The global reactivity parameters, Homo, lumo, energy gap ( $\Delta E$ ) in eV calculated at M06-2X/6-311++G(d,p) level of theory.

Table S4 NOFFs (unit in electrons) of methyl salicylate with Cl radical of initial reaction and peroxy radical with their reactivities calculated at M06-2X/6-311++G(d,p) level of theory.

Table S5 NOFFs (unit in electrons) of peroxy radical with HO<sub>2</sub>, NO<sub>2</sub>, NO radical and their corresponding intermediates, transition state and products with their reactivities calculated at M06-2X/6-311++G(d,p) level of theory.

Table S6 Topological analysis of reactants, transition states, intermediates and products of methyl salicylate with Cl radical calculated at M06-2X/6-311++G(d,p) level of theory (values are in atomic units).

## FIGURE CAPTIONS

Fig.S1 The optimized structures of the reactive species corresponding to the formation of peroxy radical I2 from the Cl-initiated reaction of Methyl salicylate at M06-2X/6-311++G(d,p) level of theory.

Fig.S2 The optimized structures of the reactive species corresponding to the reactions of peroxy radical I2 with HO<sub>2</sub>, NO<sub>2</sub> and NO at M06-2X/6-311++G(d,p) level of theory.

Fig.S3 The density plot of highest occupied molecular orbital (HOMOs) of most favourable reaction pathway calculated at M06-2X/6-311++G(d,p) level of theory. Here red region indicates the positive phase and the blue region indicates the negative phase. The contour shown is 0.05 a.u.

Fig.S4 The density plot of lowest unoccupied molecular orbital (LUMOs) of most favourable reaction pathway calculated at M06-2X/6-311++G(d,p) level of theory. Here red region indicates the positive phase and the blue region indicates the negative phase. The contour shown is 0.05 a.u.
